# Supplementary material
Source: PubMed Central journal article supplement (PMC4392216)
Supplement: annrheumdis-2013-204343-s2.pdf [file annrheumdis-2013-204343-s2.pdf]

**Table S1. Patient Characteristics**

| <b>Patient number</b> | <b>Sex</b> | <b>Age</b> | <b>Diagnostic Clinical Features (ACR)</b>                | <b>Antibodies</b> | <b>C3/4</b> | <b>SLEDAI</b> | <b>Medication</b> |
|-----------------------|------------|------------|----------------------------------------------------------|-------------------|-------------|---------------|-------------------|
| 1                     | F          | 33         | Arthritis,<br>Immunologic,<br>Pleurisy, ANA              | Anti-dsDNA        | Low         | 10            | Aza, Pred         |
| 2                     | F          | 63         | Malar rash, Oral<br>ulcers, ANA<br>Discoid               |                   | Normal      | 6             | HCQ               |
| 3                     | F          | 23         | Photosensitivity,<br>ANA,<br>Immunologic,<br>Lymphopenia | Anti-dsDNA        | Normal      | 4             | MMF, HCQ          |
| 4                     | F          | 25         | Renal, ANA,<br>Immunologic,<br>Haematologic              | Anti-dsDNA        | Normal      | 6             | HCQ, Pred         |
| 5                     | F          | 55         | Arthritis, ANA,<br>Renal,<br>Haematologic                | Anti-Ro           | Normal      | 4             | Pred              |
| 6                     | F          | 45         | Renal, ANA,<br>Immunologic,<br>Haematologic              | Anti-Sm, anti-RNP | Normal      | 8             | MMF, Pred         |
| 7                     | F          | 26         | Arthritis, Mouth<br>ulcers, ANA,<br>Immunologic          | Anti-dsDNA        | Normal      | 10            | HCQ               |
| 8                     | F          | 54         | Haematologic,<br>ANA,<br>Immunologic,<br>Arthritis       | Anti-dsDNA        | Normal      | 5             | HCQ, Pred         |
| 9                     | F          | 28         | Arthritis, Mouth<br>ulcers, ANA,<br>Immunologic          | Anti-cardiolipin  | Normal      | 6             | HCQ, Pred         |

|    |   |    |                                                                                |                                   |        |    |                |
|----|---|----|--------------------------------------------------------------------------------|-----------------------------------|--------|----|----------------|
| 10 | F | 43 | Arthritis, Mouth<br>ulcers, ANA,<br>Arthritis                                  |                                   | Normal | 6  | HCQ            |
| 11 | F | 34 | Renal,<br>Photosensitivity,<br>ANA, Malar rash                                 |                                   | Normal | 0  | MMF, HCQ       |
| 12 | F | 31 | Arthritis, Mouth<br>ulcers,<br>Immunologic, ANA                                | Anti-dsDNA, anti-<br>Ro           | Low    | 12 | MMF, Pred      |
| 13 | F | 42 | Malar rash,<br>Haematologic,<br>Arthritis,<br>Immunologic,<br>Photosensitivity | Anti-Ro, anti-RNP                 | Normal | 3  | MMF, HCQ       |
| 14 | F | 39 | Haematologic,<br>Arthritis, ANA,<br>Immunologic                                | Anti-RNP, anti-<br>cardiolipin    | Normal | 1  | MTX, HCQ       |
| 15 | F | 28 | Immunologic,<br>ANA, Renal,<br>Cerebral                                        | Anti-dsDNA                        | Normal | 4  | MMF, HCQ       |
| 16 | F | 46 | Photosensitivity,<br>Mouth ulcers,<br>Immunologic, ANA                         | ANA, Ro                           | Low    | 10 | MMF, Pred      |
| 17 | F | 38 | Photosensitivity,<br>Renal, Arthritis,<br>ANA, Immunologic                     | Anti-dsDNA, anti-<br>Ro, anti-RNP | Low    | 8  | Pred, HCQ      |
| 18 | F | 47 | Renal, ANA,<br>Immunologic,<br>Haematologic                                    | Anti-Ro, anti-<br>dsDNA           | Low    | 8  | Aza, Pred, HCQ |
| 19 | F | 69 | Malar rash, ANA,<br>Immunologic,<br>Haematologic                               | Anti-Ro/La, anti-<br>dsDNA        | Low    | 8  | Pred, HCQ      |
| 20 | F | 62 | ANA, Arthritis,<br>Photosensitivity,                                           |                                   | Normal | 7  | Aza, Pred, HCQ |

|    |   |    |                                                                  |                                        |        |    |                |
|----|---|----|------------------------------------------------------------------|----------------------------------------|--------|----|----------------|
|    |   |    | Renal                                                            |                                        |        |    |                |
| 21 | F | 22 | Arthritis, Malar rash, Pleuritis, ANA, Immunologic, Haematologic | Anti-dsDNA                             | Low    | 13 | MMF, HCQ       |
| 22 | F | 36 | Immunologic, ANA, Malar rash, Mouth ulcers                       | Anti-dsDNA, Ro, RNP                    | Normal | 6  | MMF, MTX, Pred |
| 23 | F | 27 | Renal, ANA, Immunologic, Arthritis, Photosensitivity             | Anti-RNP, anti-Ro, anti-Sm, anti-dsDNA | Low    | 12 | MMF, Pred      |
| 24 | F | 41 | Renal, ANA, Immunologic, Mouth ulcers                            | Anti-dsDNA                             | Low    | 12 | Aza, Pred, HCQ |
| 25 | M | 32 | Arthritis, Discoid rash, Malar rash, ANA                         | Anti-Ro                                | Low    | 11 | Pred           |
| 26 | F | 27 | Arthritis, Photosensitivity, ANA, Immunologic                    | Anti-dsDNA, anti-Ro                    | Normal | 8  | Pred           |
| 27 | F | 29 | ANA, Mouth ulcers, Malar rash, Renal, Haematologic, Neurologic   | Anti-dsDNA, anti-Ro, anti-Sm           | Low    | 14 | Pred, MMF      |
| 28 | F | 54 | ANA, Arthritis, Photosensitivity, Renal, Immunologic             | Anti-RNP, anti-Sm                      | Low    | 8  | HCQ            |
| 29 | F | 44 | ANA, Cerebral, Arthritis, Photosensitivity                       |                                        | N      | 0  | Aza, Pred, HCQ |

|    |   |    |                                                                    |                                   |        |    |                 |
|----|---|----|--------------------------------------------------------------------|-----------------------------------|--------|----|-----------------|
| 30 | M | 23 | ANA, Malar rash,<br>Immunologic,<br>Renal                          | Anti-dsDNA, anti-<br>Ro           | Low    | 8  | Pred, MMF       |
| 31 | F | 51 | ANA,<br>Immunologic,<br>Renal, Pericarditis,<br>Malar rash         | Anti-dsDNA, anti-<br>Ro/La        | Low    | 6  | MMF, Pred, HCQ  |
| 32 | M | 23 | ANA, Malar rash,<br>Renal,<br>Photosensitivity,<br>Immunologic     | Anti-dsDNA                        | Low    | 12 | MMF, Pred, HCQ  |
| 33 | F | 33 | Malar rash,<br>Photosensitivity,<br>Arthritis, ANA,<br>Immunologic | Anti-dsDNA, anti-<br>Ro           | Low    | 10 | HCQ             |
| 34 | F | 41 | ANA, Arthritis,<br>Immunologic,<br>Photosensitivity                | Anti-dsDNA, anti-<br>Ro, anti-Sm  | Low    | 8  | MMF, HCQ        |
| 35 | F | 43 | Renal, Mouth<br>ulcers,<br>Immunologic,<br>Malar rash              | Anti-Ro, anti-RNP                 | Normal | 8  | MMF, Pred, HCQ  |
| 36 | M |    | Malar rash,<br>Arthritis, ANA,<br>Immunologic                      | Anti-dsDNA                        | Normal | 6  | Nil             |
| 37 | F | 29 | ANA,<br>Haematologic,<br>Immunologic,<br>Arthritis                 | Anti-dsDNA, anti-<br>Ro, anti-RNP | Low    | 6  | Pred, Mepacrine |
| 38 | F | 30 | ANA, Arthritis,<br>Photosensitivity,<br>Malar rash                 |                                   | Normal | 0  | HCQ             |

|    |   |    |                                                    |                     |        |    |           |
|----|---|----|----------------------------------------------------|---------------------|--------|----|-----------|
| 39 | F | 30 | Arthritis, Malar rash, Mouth ulcers, Immunologic   | Anti-dsDNA, anti-Ro | Low    | 12 | HCQ       |
| 40 | F | 36 | ANA, Mouth ulcers, Photosensitivity, Arthritis     |                     | Normal | 4  | HCQ       |
| 41 | F | 24 | ANA, Mouth ulcers, Malar rash, Immunologic         | Anti-dsDNA, anti-Ro | Low    | 8  | HCQ, Pred |
| 42 | M | 52 | ANA, Photosensitivity, Arthritis, Mouth ulcers     |                     | Normal | 0  | HCQ       |
| 43 | F | 29 | ANA, Discoid, Mouth ulcers, Arthritis, Immunologic | anti-dsDNA          | Low    | 9  | HCQ       |

**Abbreviations:** Aza – azathioprine; Pred – prednisolone; HCQ - hydroxychloroquine, MMF - mycophenolate mofetil
